# Supplementary material for: Standard Hypercaloric, Hyperproteic vs. Leucine-Enriched Oral Supplements in Patients with Cancer-Induced Sarcopenia, a Randomized Clinical Trial
Source: MDPI journal article supplement (doi:10.3390/nu15122726), 2023-06-12
Supplement: s1 [file s1]

**Table S1. Composition for 100 ml of the standard and leucine-enriched oral supplements**

| <b>Characteristics</b>             | <b>Standard</b> | <b>Leucine-enriched</b> |
|------------------------------------|-----------------|-------------------------|
| <b>Kcal</b>                        | 160             | 151                     |
| <b>Energetic density (Kcal/mL)</b> | 1.6             | 1.51                    |
| <b>Fat (g)</b>                     | 6.7             | 5.2                     |
| Saturated (g)                      | 0.8             | 0.46                    |
| Monounsaturated (g)                | 3.9             |                         |
| Polyunsaturated (g)                | 1.8             |                         |
| <b>Carbohydrates (g)</b>           | 15.7            | 14,8                    |
| Sugar (g)                          | 9.5             | 8,1                     |
| Lactose (g)                        | 0.9             | < 0.2                   |
| <b>Proteins (g)</b>                | 9.8             | 10.4                    |
| Serumproteins (g)                  | 1.4             | 9.7                     |
| Casein (g)                         | 8.4             | 0                       |
| L-leucin (g)                       | 0               | 1.5                     |
| <b>Vitamin D (mcg)</b>             | 1.2             | 5                       |
| <b>Osmolality (mOsm/L)</b>         | 540             | 680                     |

**Table S2. Morphofunctional assessment of the nutritional status at baseline and three months after nutritional support in all patients**

| <b>Characteristics</b>                         | <b>Baseline (n=46)</b>  | <b>Three months (n=42)</b> | <b>p1</b>   |
|------------------------------------------------|-------------------------|----------------------------|-------------|
| <b>Body weight</b>                             | 63.6 (40-89)            | 60.3 (42-92)               | 0.2         |
| <b>Bioimpedance analysis</b>                   |                         |                            |             |
| BMI (Kg/m <sup>2</sup> )                       | 23.6 (16.6-33)          | 23.8 (16.1-32.9)           | 0.5         |
| BCMe                                           | 30 (17.9-41.3)          | 29.6 (10.2-41.8)           | 0.2         |
| ECMe                                           | 17.6 (11.3-22.8)        | 18 (12.3-23.4)             | 0.2         |
| Fat mass (%)                                   | 27 (12.6-59.3)          | 26.8 (8.7-40.7)            | 0.2         |
| Fat mass (Kg)                                  | 17 (7-33.2)             | 16.4 (4.2-33.7)            | 0.6         |
| Lean mass (%)                                  | 69.2 (56.9-83.1)        | 69.6 (56-86.7)             | 0.2         |
| Lean mass (Kg)                                 | 45.4 (25.2-60.9)        | 45.6 (29.8-62)             | 0.08        |
| Water (%)                                      | 50.2 (42.8-64.2)        | 51.7 (42.3-63.9)           | 0.2         |
| Water (Kg)                                     | 32.5 (20.8-44.2)        | 33.5 (21.9-46.2)           | 0.1         |
| Bone Mass (Kg)                                 | 2.4 (1.5-3.2)           | 2.4 (1.6-3.2)              | 0.6         |
| <b>Phase angle</b>                             | 4.5 (3.6-5.9)           | 4 (3.5-5.6)                | 0.12        |
| <b>Anthropometric evaluation</b>               |                         |                            |             |
| Abdominal circumference                        | 95 (76-126)             | 91 (76-117)                | 0.2         |
| Arm circumference                              | 26 (21-33)              | 27 (20-34)                 | 0.2         |
| Calf circumference                             | 33 (26-40)              | 34 (27-40)                 | 0.9         |
| <b>Muscle Ecography</b>                        |                         |                            |             |
| Adipose tissue                                 | 0.64 (0.21-2.31)        | 0.74 (0.34-1.44)           | 1           |
| Area                                           | 2.5 (0.96-5)            | 3 (1-5.7)                  | 0.6         |
| Circunference                                  | 7.7 (2.5-11)            | 8.3 (5.6-10.7)             | 0.9         |
| AP axis                                        | 0.9 (0.36-1.48)         | 0.98 (0.56-1.77)           | 0.9         |
| Transversal axis                               | 3.24 (2.39-9.34)        | 3.58 (1.8-4.2)             | 0.2         |
| <b>Abdominal ecography</b>                     |                         |                            |             |
| Total adipose tissue                           | 1.8 (1-4)               | 1.9 (0.8-4.8)              | 0.8         |
| Subcutaneous adipose tissue                    | 1.15 (0.9-1.51)         | 1.16 (0.8-1.7)             | 0.9         |
| <b>Superficial subcutaneous adipose tissue</b> | <b>0.51 (0.37-0.68)</b> | <b>0.59 (0.36-0.8)</b>     | <b>0.02</b> |

|                                  |                 |                  |             |
|----------------------------------|-----------------|------------------|-------------|
| Deep subcutaneous adipose tissue | 0.6 (0.1-2.5)   | 0.59 (0.1-2.3)   | 0.7         |
| Preperitoneal adipose tissue     | 0.5 (0.3-1.3)   | 0.5 (0.08-1.4)   | 0.3         |
| <b>Functional evaluation</b>     |                 |                  |             |
| Dynamometry (dominant arm)       | 26 (7-51)       | 26 (14-50)       | 0.1         |
| <b>Stand up test</b>             | <b>9 (0-17)</b> | <b>10 (4-22)</b> | <b>0.03</b> |

---

*p* refers to the comparison between patients at baseline and after three months of nutritional support with OS

**Table S3. Morphofunctional assessment of the nutritional status at baseline and three months after nutritional support with standard and leucine-enriched OS**

| Characteristics                  | Standard OS      |                     |      | Leucine-enriched OS   |                         |             |
|----------------------------------|------------------|---------------------|------|-----------------------|-------------------------|-------------|
|                                  | Baseline (n=25)  | Three months (n=22) | p1   | Baseline (n=21)       | Three months (n=20)     | p2          |
| <b>Body weight</b>               | 65.8 (51-89)     | 60.6 (42-92)        | 0.9  | <b>60 (39-80)</b>     | <b>60.3 (44-92)</b>     | <b>0.03</b> |
| <b>Bioimpedance analysis</b>     |                  |                     |      |                       |                         |             |
| BMI (Kg/m <sup>2</sup> )         | 24 (19.6-30.2)   | 21.5 (16.6-29)      | 0.5  | <b>23.4 (16.6-29)</b> | <b>24.2 (16.1-31.5)</b> | <b>0.03</b> |
| BCMe                             | 29.9 (22.6-41.3) | 28.2 (10.2-39.5)    | 0.3  | 27.8 (21.5-38.4)      | 30.8 (21.4-41.8)        | 0.3         |
| ECMe                             | 17.6 (13.7-22.8) | 17.9 (12.3-23.4)    | 0.8  | 15.5 (11.3-21.5)      | 18.5 (12.9-23.4)        | 0.09        |
| Fat mass (%)                     | 27.4 (17.7-36.5) | 26 (9.9-40.7)       | 0.2  | 23.9 (16.1-34.6)      | 26 (8.7-37.4)           | 0.9         |
| Fat mass (Kg)                    | 14.7 (10.8-27.7) | 15.5 (4.2-33.7)     | 0.5  | 16.1 (7-2.7)          | 16.4 (5-31.6)           | 0.8         |
| Lean mass (%)                    | 68.9 (60.3-78.2) | 69.5 (56-85)        | 0.09 | 71.9 (62-79.7)        | 70 (59.5-86.7)          | 0.9         |
| Lean mass (Kg)                   | 45 (34.8-60.9)   | 45.4 (29.8-60.4)    | 0.5  | 41.1 (25.2-56.9)      | 46.8 (32.5-62)          | 0.1         |
| Water (%)                        | 50.2 (44.7-58.8) | 51.8 (42.3-63.1)    | 0.1  | 53.4 (45.7-64.2)      | 51.7 (44.4-63.9)        | 1           |
| Water (Kg)                       | 32.2 (25.8-44.2) | 32.8 (21.9-46.2)    | 0.4  | 30.7 (24.7-42)        | 34.2 (24.2-45.7)        | 0.3         |
| Bone Mass (Kg)                   | 2.4 (1.9-3.2)    | 2.4 (1.6-3.2)       | 0.3  | 2.2 (1.7-3)           | 2.5 (1.8-3.2)           | 0.1         |
| Phase angle                      | 5.7 (3.3-13.7)   | 4.3 (2.1-6.8)       | 0.16 | 5.3 (3.3-22.1)        | 4.6 (2.7-6.7)           | 0.44        |
| <b>Anthropometric evaluation</b> |                  |                     |      |                       |                         |             |
| Abdominal circumference          | 98 (76-113)      | 90 (76-117)         | 0.3  | 90 (72-107)           | 93 (77-113)             | 0.3         |
| Arm circumference                | 26 (24-32)       | 27 (20-34)          | 0.3  | 26 (21-31)            | 26 (21-34)              | 0.1         |
| Calf circumference               | 33 (26-39)       | 33 (27-39)          | 0.9  | 33 (27-38)            | 34 (28-40)              | 0.9         |
| <b>Muscle Ecography</b>          |                  |                     |      |                       |                         |             |
| Adipose tissue                   | 0.69 (0.38-0.97) | 0.85 (0.53-1.37)    | 0.4  | 0.53 (0.31-1.21)      | 0.7 (0.34-1.44)         | 0.2         |
| Area                             | 3 (1.7-4.2)      | 3 (1.6-5.7)         | 0.2  | 2.6 (1-5)             | 2.9 (1-5.3)             | 0.6         |
| Circunference                    | 8.4 (6.3-9.5)    | 8.3 (5.6-10.7)      | 1    | 8.1 (5.7-9.6)         | 8.3 (5.7-10.8)          | 0.9         |
| AP axis                          | 1.13 (0.46-1.44) | 1.02 (0.72-1.77)    | 0.1  | 0.86 (0.36-1.48)      | 0.82 (0.56-1.68)        | 0.8         |
| Transversal axis                 | 3.28 (2.58-9.34) | 3.53 (1.8-4.2)      | 0.8  | 3.48 (2.6-4.02)       | 3.7 (2.3-4.2)           | 0.9         |
| <b>Abdominal ecography</b>       |                  |                     |      |                       |                         |             |
| Total adipose tissue             | 1.9 (1-3)        | 1.9 (0.8-4.8)       | 0.7  | 1.5 (1-2.6)           | 1.8 (1-4)               | 0.5         |

|                                         |                         |                         |              |                  |                   |             |
|-----------------------------------------|-------------------------|-------------------------|--------------|------------------|-------------------|-------------|
| Subcutaneous adipose tissue             | 1.2 (0.4-2.25)          | 1.3 (0.4-3.3)           | 0.7          | 1 (0.4-1.9)      | 1 (0.5-2.9)       | 0.5         |
| Superficial subcutaneous adipose tissue | <b>0.56 (0.42-0.71)</b> | <b>0.64 (0.46-0.82)</b> | <b>0.03</b>  | 0.47 (0.32-0.66) | 0.55 (0.31-0.70)  | 0.4         |
| Deep subcutaneous adipose tissue        | 0.6 (0.2-1.5)           | 0.69 (0.1-1.4)          | 0.6          | 0.5 (0.1-1)      | 0.6 (0.2-2.3)     | 0.9         |
| Preperitoneal adipose tissue            | 0.5 (0.3-1)             | 0.5 (0.08-1.3)          | 0.3          | 0.5 (0.3-0.8)    | 0.4 (0.3-1.4)     | 0.6         |
| <b>Functional evaluation</b>            |                         |                         |              |                  |                   |             |
| Dynamometry (dominant arm)              | 27.3 (7-51)             | 25 (14-47)              | 0.2          | 24 (8-40)        | 28 (17-51)        | 0.5         |
| Stand up test                           | <b>9.5 (5-11)</b>       | <b>11 (6-10)</b>        | <b>0.008</b> | <b>8 (6-10)</b>  | <b>9.8 (8-12)</b> | <b>0.02</b> |

*p*1 refers to the comparison between patients that received standard OS at baseline and after three months; *p*2 refers to the comparison between patients that received leucine-enriched OS at baseline and after three months

**Table S4. Biochemical analysis at baseline and three months after nutritional support in the whole cohort**

| Characteristics               | Baseline (n=46)        | Three months (n=42) | <i>p</i> 1       |
|-------------------------------|------------------------|---------------------|------------------|
| <b>Biochemical parameters</b> |                        |                     |                  |
| Haemoglobin                   | 13.5 (8.7-16.2)        | 13.2 (9.6-16)       | 0.7              |
| Lymphocytes                   | 990 (600-3590)         | 2720 (600-2900)     | 0.7              |
| Albumin (g/dl)                | 4.5 (3.8-5.3)          | 4.5 (3.8-5.2)       | 0.5              |
| Prealbumin (mg/dl)            | <b>23 (8.9-56)</b>     | <b>24 (5-36)</b>    | <b>0.02</b>      |
| Ferritin (mg/dl)              | 152 (5-1213)           | 155 (3-974)         | 0.6              |
| Transferrin (mg/dl)           | 235 (123-342)          | 256 (133-347)       | 0.2              |
| Total cholesterol (mg/dl)     | 182 (100-281)          | 176 (106-261)       | 0.6              |
| HDL cholesterol               | 47 (29-81)             | 52 (29-72)          | 0.06             |
| LDL cholesterol               | 106 (51-195)           | 99 (44-164)         | 0.8              |
| Triglycerides                 | 134 (73-468)           | 130 (87-393)        | 0.7              |
| RCP                           | <b>5.1 (0.5-10309)</b> | <b>2.8 (0-147)</b>  | <b>0.03</b>      |
| Vitamin D                     | <b>12 (7-30)</b>       | <b>33 (16-68)</b>   | <b>&lt;0.001</b> |

*p* refers to the comparison between patients at baseline and after three months of nutritional support with OS

**Table S5. Biochemical analysis at baseline and three months after nutritional support with standard and leucine-enriched OS**

| Characteristics               | Standard OS            |                      |                  | Leucine-enriched OS |                     |             |
|-------------------------------|------------------------|----------------------|------------------|---------------------|---------------------|-------------|
|                               | Baseline (n=25)        | Three months (n=22)  | <i>p1</i>        | Baseline (n=21)     | Three months (n=20) | <i>p2</i>   |
| <b>Biochemical parameters</b> |                        |                      |                  |                     |                     |             |
| Haemoglobin                   | 14.3 (8.7-15.4)        | 13.4 (9.9-15.9)      | 0.6              | 13 (12.1-16.2)      | 13.1 (9.6-16)       | 0.9         |
| Lymphocytes                   | 1800 (1020-3590)       | 1120 (920-2900)      | 0.7              | 2100 (600-2340)     | 2600 (600-1800)     | 0.2         |
| Albumin (g/dl)                | 4.4 (3.8-5.2)          | 4.7 (3.8-5)          | 0.2              | 4.9 (4-5.3)         | 4.4 (3.8-5.2)       | 0.7         |
| Prealbumin (mg/dl)            | <b>19.4 (8.9-30.9)</b> | <b>23 (14-36)</b>    | <b>0.004</b>     | 25.9 (13.9-56)      | 24 (5-33)           | 0.2         |
| Ferritin (mg/dl)              | 138.8 (52.3-1213)      | 128 (3-974)          | 0.8              | 173 (15-768)        | 144 (68-279)        | 0.4         |
| Transferrin (mg/dl)           | <b>219 (158-305)</b>   | <b>279 (113-296)</b> | <b>0.05</b>      | 235 (188-337)       | 248 (133-296)       | 0.8         |
| Total cholesterol (mg/dl)     | 153 (100-277)          | 197 (106-261)        | 0.9              | 174 (123-227)       | 173 (125-239)       | 0.5         |
| HDL cholesterol               | <b>41 (29-74)</b>      | <b>50 (30-71)</b>    | <b>0.03</b>      | 53 (44-81)          | 53 (29-72)          | 0.6         |
| LDL cholesterol               | 93 (51-187)            | 108 (51-164)         | 0.5              | 94 (46-177)         | 96 (44-152)         | 0.7         |
| Triglycerides                 | 131 (73-181)           | 110 (89-393)         | 0.7              | 114 (93-468)        | 135 (87-231)        | 0.4         |
| RCP                           | <b>8.6 (0.5-10309)</b> | <b>1.7 (0-17)</b>    | <b>0.03</b>      | 1 (0-47)            | 3.6 (0-147)         | 0.4         |
| Vitamin D                     | <b>15.4 (8-24)</b>     | <b>34 (22-66)</b>    | <b>&lt;0.001</b> | <b>11 (8-33)</b>    | <b>32 (16-68)</b>   | <b>0.01</b> |

*p1* refers to the comparison between patients that received standard OS at baseline and after three months; *p2* refers to the comparison between patients that received leucine-enriched OS at baseline and after three months
